# Supplementary material for: Promoting Recruitment using Information Management Efficiently (PRIME): study protocol for a stepped-wedge cluster randomised controlled trial within the REstart or STop Antithrombotics Randomised Trial (RESTART)
Source: Springer Nature journal article supplement (doi:10.1186/s13063-016-1692-7), 2017-01-13
Supplement: MOESM1 [file 12101206]

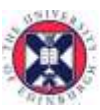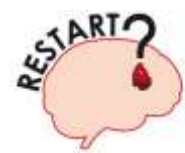

## RESTART Pre-Recruitment Review Questionnaire

**Thank you** for agreeing to take part in a Recruitment Review. In preparation for it please take the time to complete and return this questionnaire to me.

*Amy*

Study Recruitment Co-Ordinator

Tel: 07490 691 430

Email: [amy.maxwell@ed.ac.uk](mailto:amy.maxwell@ed.ac.uk)

### Instructions for completion

- Please place a cross in the appropriate box e.g. Yes  No
- To start completing the form, please use your mouse to click in 'Centre Number' and use the tab key to move through the fields.
- If you do not have enough space for your answer please use the additional comments box at the end, clearly labelling it with the number of the question it relates to.

Centre Number

Centre Name

**1. (For English centres only) Has there been any impact on your site following the restructuring of the Stroke Research Network?** e.g. did you work solely in Stroke before the restructure, do you now work solely in Stroke following the restructure, if not what other specialities do you cover, has there been an impact on resources at your site etc.

**2. (i) What proportion of In-Patients, who are suitable for follow-up, are seen in clinic after hospital discharge, (ii) who sees them and (iii) when?**



## RESTART Pre-Recruitment Review Questionnaire

**3. Have you approached patients looked after by your stroke unit in the past to invite them back to clinic, with a view to recruit them to RESTART?**

Yes

No

Any comments;

**4. Have you used the template invitation letter, disseminated with RESTART protocol v6, to invite potential RESTART patients to clinic?**

Yes

No

If Yes, how effective have they been?

**5. Are your stroke audit data complete and accurate, to the best of your knowledge?**

Yes

No

Any comments;

**6. (i) Who is the main contact for your hospital's stroke audit data, and (ii) what is their email address?**

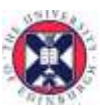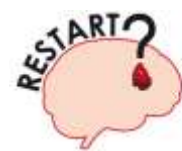

## RESTART Pre-Recruitment Review Questionnaire

**7. Do you routinely use the stroke audit data to identify potential patients for RESTART?**

Yes

No

Any comments;

**8. What other sources of information do you have on patients looked after at your stroke unit in the past, which could be used to identify patients who might be eligible for RESTART? (Please enter a 'X' in each relevant box)**

Screening logs

A database other than stroke audit

Other – please specify;

**9. Have you used any other methods to boost recruitment to RESTART? If yes, please give details below;**

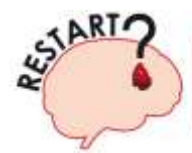

## RESTART Pre-Recruitment Review Questionnaire

10. Have you found any barriers to finding suitable patients for recruitment to RESTART? If yes, please give details below;

Additional comments

*Thank you for taking the time to complete this questionnaire.*
