# Supplementary material for: Promoting Recruitment using Information Management Efficiently (PRIME): study protocol for a stepped-wedge cluster randomised controlled trial within the REstart or STop Antithrombotics Randomised Trial (RESTART)
Source: Springer Nature journal article supplement (doi:10.1186/s13063-016-1692-7), 2017-01-13
Supplement: MOESM5 [file 12101206]

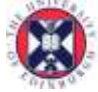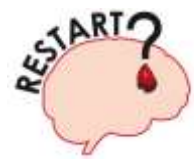

## RESTART Recruitment Review 6 month Follow-up Questionnaire

**Thank you** for agreeing to have a 6 month follow up discussion. In preparation for it please take the time to complete and return this questionnaire to me.

*Amy*

Study Recruitment Co-Ordinator

Tel: 07490 691 430

Email: [amy.maxwell@ed.ac.uk](mailto:amy.maxwell@ed.ac.uk)

### Instructions for completion

- Please place a cross in the appropriate box e.g. Yes  No
- To start completing the form, please use your mouse to click in 'Centre Number' and use the tab key to move through the fields.

Centre Number

Centre Name

**1. Since receiving your recruitment review, have you generated and used the audit data extract RESTART reports? If 'Yes' go to question 2 If 'No' go to question 12**

Yes

No

**2. (i) How far back did you run the reports to, and**

**(ii) How many times have you run them?**

|                                                                     | Inpatients Report 1  | Inpatients Report 2  | Or Both              |
|---------------------------------------------------------------------|----------------------|----------------------|----------------------|
| <b>3. How many patients did the reports identify?</b>               | <input type="text"/> | <input type="text"/> | <input type="text"/> |
| <b>4. How many of these patients were eligible?</b>                 | <input type="text"/> | <input type="text"/> | <input type="text"/> |
| <b>5. How many of those eligible did you contact?</b>               | <input type="text"/> | <input type="text"/> | <input type="text"/> |
| <b>6. Out of those contacted; how many responded?</b>               | <input type="text"/> | <input type="text"/> | <input type="text"/> |
| <b>7. Out of those who responded; how many came back to clinic?</b> | <input type="text"/> | <input type="text"/> | <input type="text"/> |
| <b>8. Out of those who responded; how many declined?</b>            | <input type="text"/> | <input type="text"/> | <input type="text"/> |
| <b>9. How many that returned were randomised?</b>                   | <input type="text"/> | <input type="text"/> | <input type="text"/> |

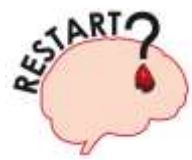

### RESTART Recruitment Review 6 month Follow-up Questionnaire

|                                                                                                    |                          |                          |                          |                          |                          |
|----------------------------------------------------------------------------------------------------|--------------------------|--------------------------|--------------------------|--------------------------|--------------------------|
| <b>10. Do you think that the reports were useful in identifying potentially eligible patients?</b> | Strongly agree           | Agree                    | Neutral                  | Disagree                 | Strongly disagree        |
|                                                                                                    | <input type="checkbox"/> | <input type="checkbox"/> | <input type="checkbox"/> | <input type="checkbox"/> | <input type="checkbox"/> |

**11. Have you had any (i) problems running or using the reports e.g. received any complaints about them, had lack of time/resource to use them, or (ii) think there are any disadvantages with using the reports?**

Yes  *If 'Yes' please provide details below* No

**12. If you didn't use the bespoke reports (Q 1) What were the barriers that prevented you from using them?**

**13. Are there any improvements you would like to suggest for the reports?**

*Thank you for taking the time to complete this questionnaire.*
